# Supplementary material for: Design and synthesis of nano-biomaterials based on graphene and local delivery of cerebrolysin into the injured spinal cord of mice, promising neural restoration
Source: Royal Society of Chemistry journal article supplement (doi:10.1039/d3na00760j), 2024-01-01
Supplement: d3na00760j1.pdf [file d3na00760j1.pdf]

## Design and synthesis of nano-biomaterials based on graphene and local delivery of Cerebrolysin into the injured spinal cord of mouse, promising neural restoration

Ayda Yari-Illkhchi,<sup>a, b, c</sup> Mehrdad Mahkam,<sup>a\*</sup> Abbas Ebrahimi-Kalan,<sup>b</sup> Hamid Soltani Zangbar<sup>b</sup>

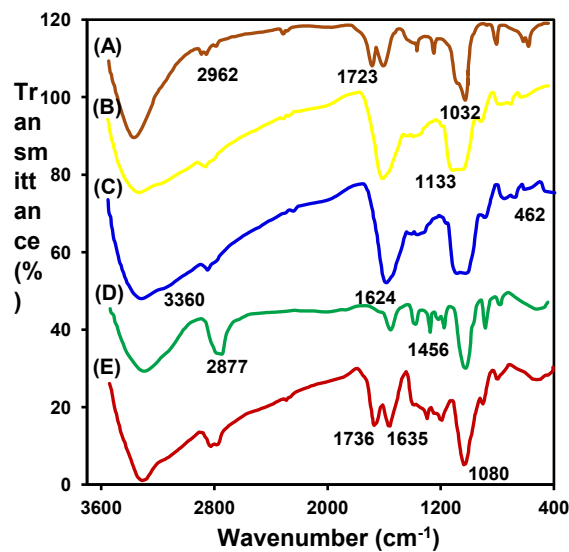

Fig S1. FTIR spectra of (A) GO, (B) GO-SiO<sub>2</sub>-NH<sub>2</sub>, (C) GO-Au, (D) PEG, and (E) GO-PG.

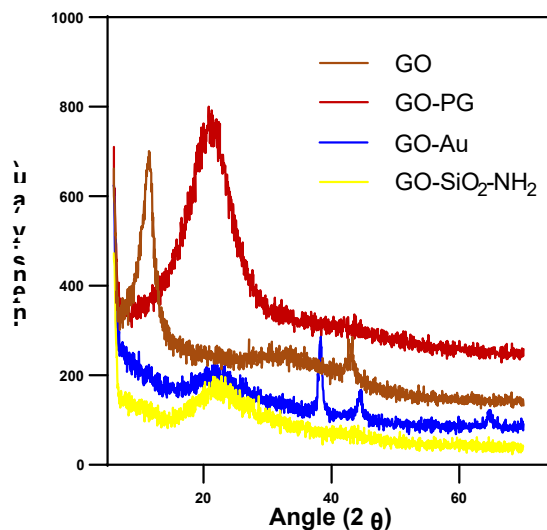

Fig S2. XRD diffractogram of GO, GO-PG, GO-Au, and GO-SiO<sub>2</sub>-NH<sub>2</sub>.

(a)

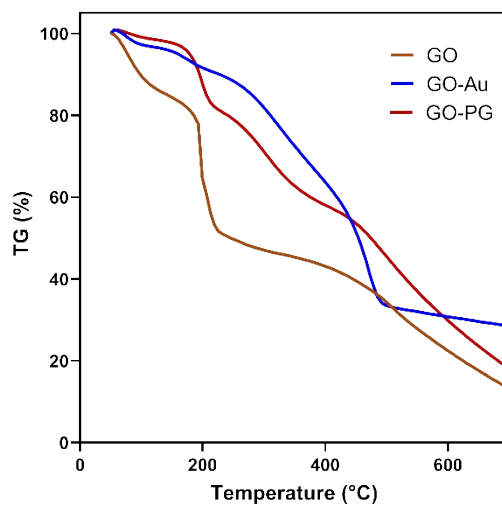

(b)

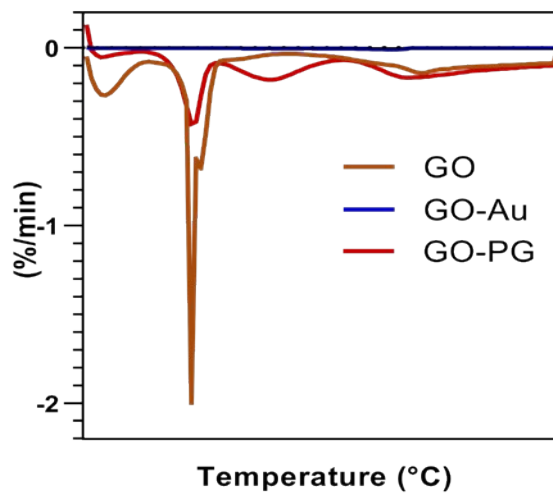

Fig S3. (a) TGA pattern, and (b) DTG curves of GO, GO-PG, and GO-Au.

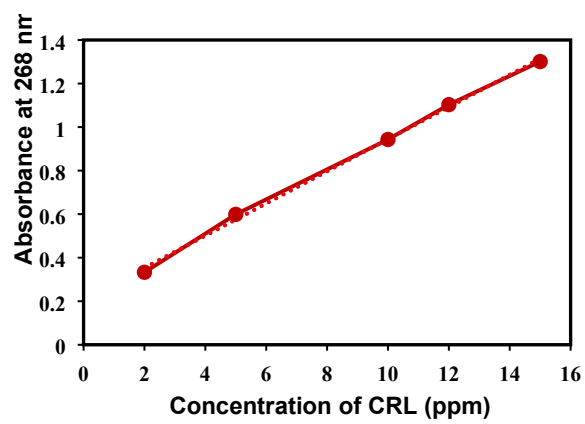

Fig S4. Calibration standard of CRL
